# Supplementary material for: Synergistic function of Bi and B in interstitial ternary Pd–Bi–B alloy nanocrystals for highly active and durable electrochemical ethanol oxidation
Source: Royal Society of Chemistry journal article supplement (doi:10.1039/d5ta00245a), 2025-01-01
Supplement: d5ta00245a1.pdf [file d5ta00245a1.pdf]

## Supporting Information

# Synergistic Function of Bi and B in Interstitial Ternary Pd-Bi-B Alloy Nanocrystals for Highly Active and Durable Electrochemical Ethanol Oxidation

Poliraju Kalluru,<sup>‡a</sup> Ghufra Aulia Bin Azizar,<sup>‡b</sup> Respati K. Pramadewandaru,<sup>‡c</sup> Tae Gyun Kim,<sup>a</sup> Jieun Yu,<sup>a</sup> Dong Il Kang,<sup>a</sup> Jaehoon Jung,<sup>a</sup> Young Wook Lee<sup>\*d</sup> and Jong Wook Hong<sup>\*b</sup>

<sup>‡</sup>These authors contributed equally to this work

<sup>a</sup>P. Kalluru, T. G. Kim, J. Yu, D. I. Kang, J. Jung

Department of Chemistry, University of Ulsan, Ulsan 44776, South Korea

<sup>b</sup>G. A. B. Azizar, J. W. Hong

Department of Energy Engineering, Korea Institute of Energy Technology (KENTECH),  
Naju, 58330, South Korea

Email: jwhong@kentech.ac.kr (J.W.H)

<sup>c</sup>R. K. Pramadewandaru

Department of Materials and Metallurgical Engineering Sepuluh Nopember Institute of  
Technology Surabaya, East Java, Indonesia

<sup>d</sup>Y. W. Lee

Department of Education Chemistry and Research Institute of Natural Sciences, Gyeongsang  
National University, Jinju 52828, Republic of Korea

E-mail: lyw2020@gnu.ac.kr (Y.W.L)

## **Experimental**

### **Nanocrystal separation**

For of Pd<sub>4</sub>Bi NCs, the mixture containing Pd<sub>4</sub>Bi NCs was then centrifuged at 10,000 rpm for 10 min. Further, 3 to 4 times washed with a mixture of acetone and ethanol, centrifuged at 12,000 rpm for 10 min. For Pd<sub>4</sub>Bi–B NCs, the product was washed three times with an ethanol, centrifuged at 8000 rpm for 7 min. Finally, the Pd<sub>4</sub>Bi–B NCs were dispersed in ethanol for further use.

### **Methods for ECSAs of catalysts**

The electrochemical measurements of the double-layer capacitance ( $C_{dl}$ ) and copper underpotential deposition (Cu-UPD) were performed via CV testing to assess the ECSA. CV scans were conducted at scan rates from 20 to 100 mV s<sup>-1</sup> within a potential window free of faradaic processes (-0.85 V to 0.40 V vs. Hg/HgO). For the Cu-UPD experiments, an N<sub>2</sub> saturated electrolyte was used. Two different electrolyte compositions were employed such as 0.002 M Cu<sub>2</sub>SO<sub>4</sub> + 0.05 M H<sub>2</sub>SO<sub>4</sub> for acid condition and 0.010 M CuSO<sub>4</sub> + 1.0 M KOH for alkaline condition. In these experiments, the potential was held for 5 min at 0.3 V (vs. Ag/AgCl) for the acidic electrolyte and at -0.3 V (vs. Hg/HgO) for the alkaline electrolyte. The ECSA was calculated by subtracting the background CV responses, which were recorded in the N<sub>2</sub>-saturated electrolyte.

### **Characterization**

Transmission electron microscopy (TEM) images of the prepared catalysts were obtained by using a JEOL JEM-2100F respectively. ICP-OES measurement was conducted using a Spectroblue-ICP-OES (Ametek). X-ray diffraction (XRD) measurement was conducted on a Rigaku D/ MAX2500V/PC. X-ray photoelectron spectroscopy (XPS) measurements were

conducted by using a Thermo VG Scientific Sigma Probe spectrometer with Al K $\alpha$  X-ray (1486.6 eV) as a light source. XPS data were calibrated using the C 1 s peak at 284.5 eV.

### Density functional theory (DFT) calculation

The periodic DFT calculations were performed to investigate the influence of boron insertion into the interstitial octahedral sites of Bi-doped Pd nanocrystal (NC) on its electronic and geometric properties. We employed Perdew-Burke-Ernzerhof (PBE) functional<sup>S1</sup> implemented in the Vienna Ab-initio Simulation Package (VASP) code.<sup>S2,S3</sup> Grimme's D3 method<sup>S4</sup> was also utilized for dispersion corrections. The core electrons were replaced by projector-augmented wave (PAW) pseudopotentials,<sup>S5</sup> expanded in a basis set of plane waves up to a cutoff energy of 400 eV. Ionic (electronic) relaxations were performed until atomic forces (energies) were less than 0.01 eV/Å ( $10^{-7}$  eV). The  $12 \times 12 \times 12$   $\Gamma$ -centered grids were used for the  $k$ -point sampling of the Brillouin zone. The optimized lattice constants of 3.88 (3.94) Å for Pd was obtained from PBE-D3 (PBE) calculations, which agrees well with the experimental value, 3.89 Å.<sup>S6</sup> Based on the atomic ratio of 1:4 between Bi and Pd estimated from the experimental results, we simply substituted one of four Pd atoms with a Bi atom in a conventional *fcc*-type Pd unit cell, which results in Bi:Pd = 1:3, to minimize the structural complexity due to atomic substitution in an approximated manner (Fig. S4). Two kinds of the octahedral (Oh) sites, i.e., (i) Oh-I site composed of six Pd atoms and (ii) Oh-II site composed of four Pd and two Bi atoms, are available for boron insertion. The insertion of boron into Oh-I site is more favorable than that into Oh-II site by 1.70 (1.65) eV of which the relative energy was obtained using PBE-D3 (PBE) calculations. Therefore, B-insertion into Oh-I site, i.e., Pd–Bi–B model I, was mainly utilized to investigate the influence of B on the electronic and geometric structures of Pd–Bi binary alloy NC (Fig. S4c). The Bi substitution followed by B insertion leads to the geometric expansion of pristine *fcc* Pd lattice (see Table S3), and

accordingly the volumes of Pd–Bi and Pd–Bi–B become larger than that of Pd lattice by 16.3% and 35.1%, respectively. The interlayer distance between (111) plane of optimized Pd–Bi and Pd–Bi–B models are 2.36 and 2.48 Å which are in good agreement with the experimental observation. The electronic structures of Pd, Pd–Bi, and Pd–Bi–B models were examined with the projected density of states (PDOS) (Fig. 4 in the main manuscript) and crystal orbital overlap population (COOP) analysis (Fig. S5). The COOP analysis was carried out using LOBSTER software.<sup>S7</sup> Furthermore, considering the simplicity of our model structures, both model I and II for Pd–Bi–B system were employed for elucidating the charge redistribution between inserted B atom and directly neighboring Pd and Bi atoms using the charge density difference plot (Fig. 4b) and the population analysis obtained with the density-derived electrostatic and chemical (DDEC) method <sup>S8</sup> (Table S4).

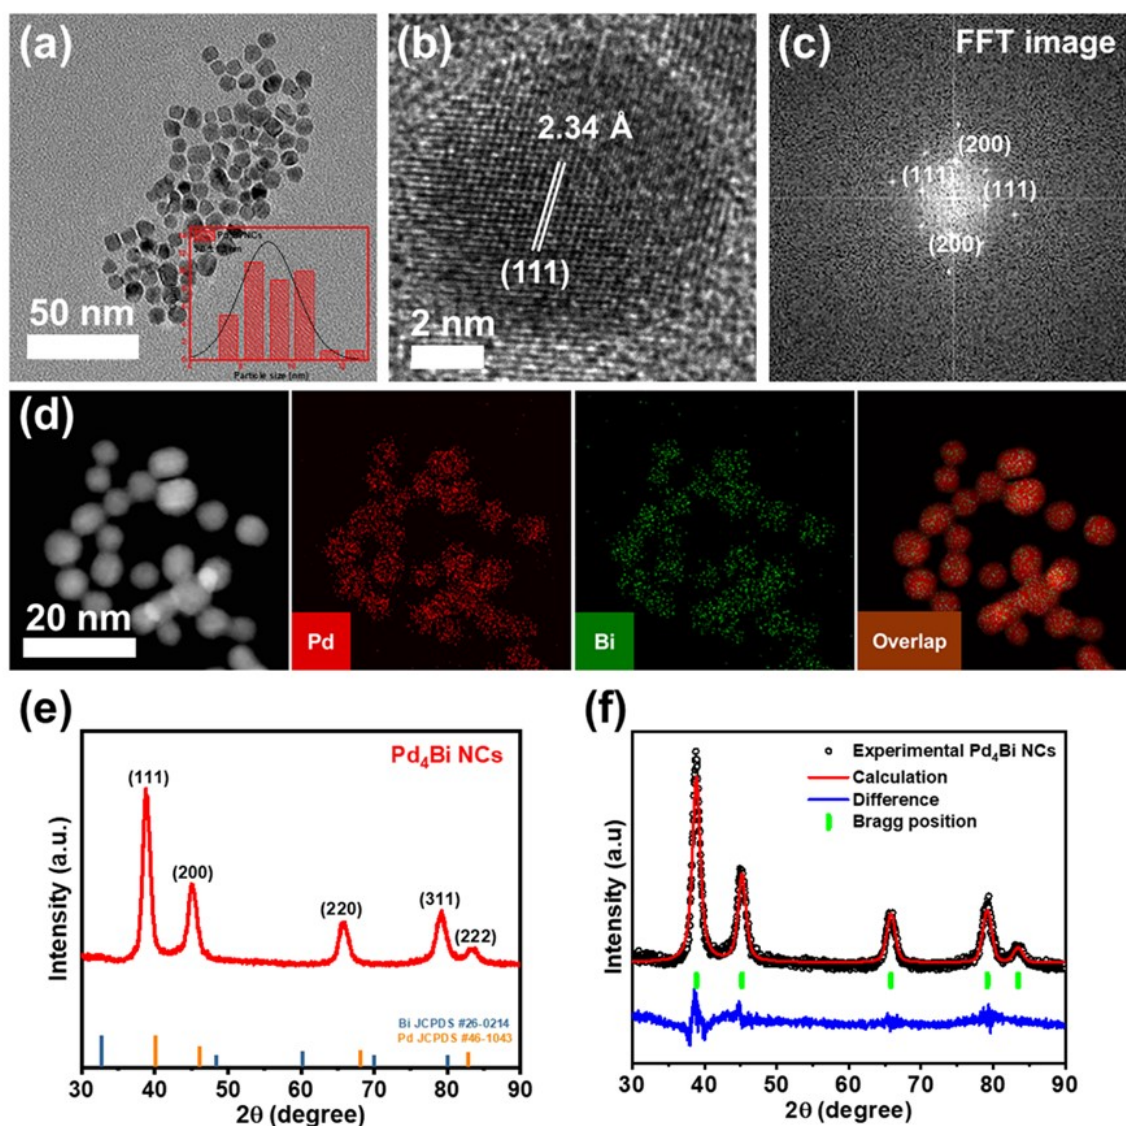

**Fig. S1** (a) TEM image of Pd<sub>4</sub>Bi NCs and particle size distribution (inset of Fig. S1a). (b) HRTEM image of Pd<sub>4</sub>Bi NCs and (c) corresponding FFT pattern. (d) HAADF-STEM and corresponding EDS elemental mapping images of Pd<sub>4</sub>Bi NCs. (e) XRD pattern and (f) Rietveld refinement of Pd<sub>4</sub>Bi NCs.

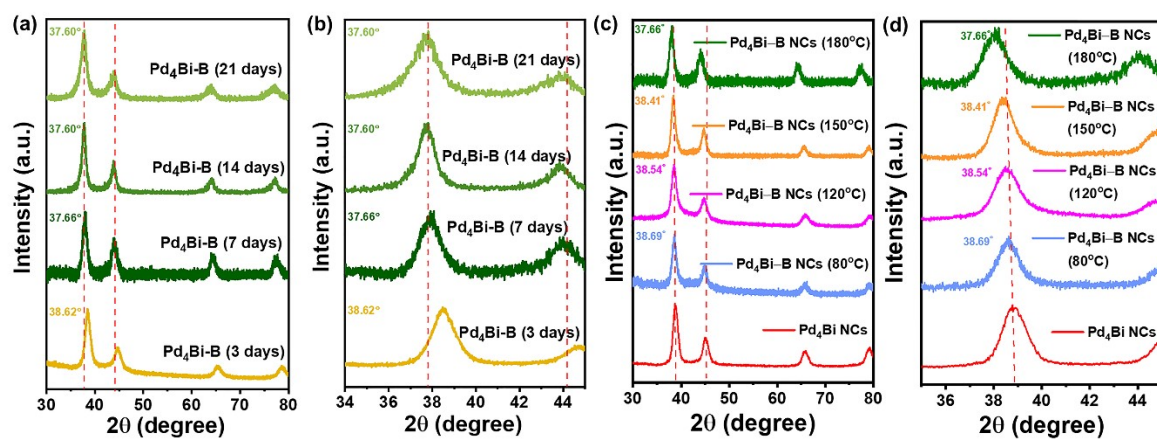

**Fig. S2** XRD patterns of  $\text{Pd}_4\text{Bi-B}$  NCs with different (a) reaction times and (b) reaction temperatures.

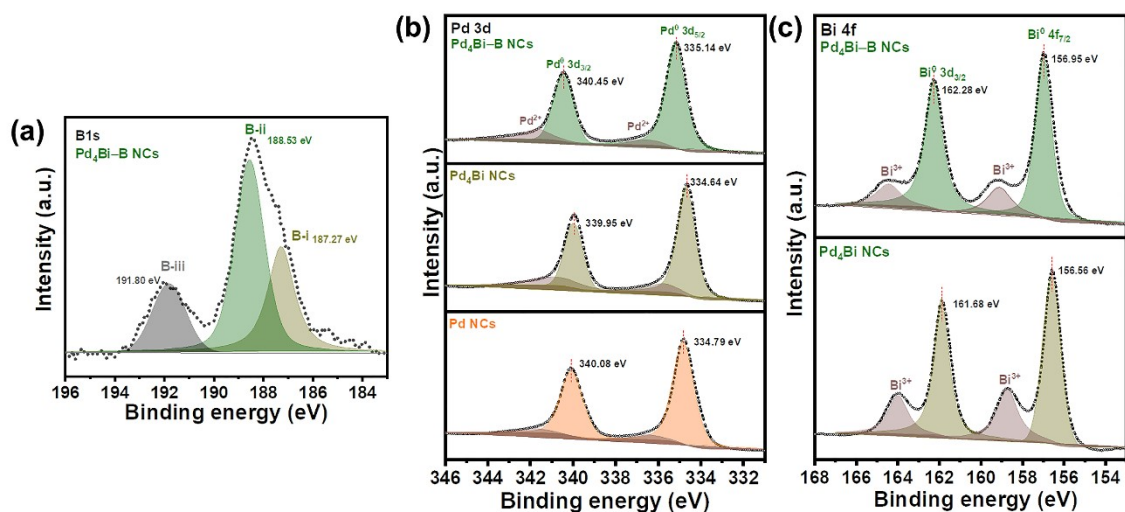

**Fig. S3** (a) B 1s, (b) Pd 3d, and (c) Bi 4f core level XPS spectra of different catalysts.

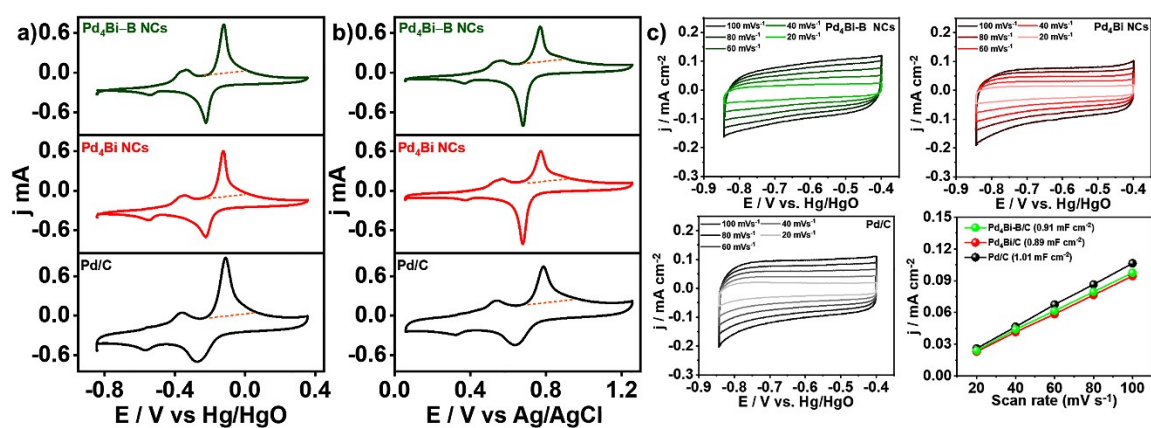

**Fig. S4** Cu UPD curves for all catalysts in (a) 1.0 M KOH + 0.01 M  $\text{CuSO}_4$  and (b) 1.0 M KOH + 0.01 M  $\text{H}_2\text{SO}_4$ . (c)  $C_{dl}$  plot in 1.0 M KOH with different scan rate.

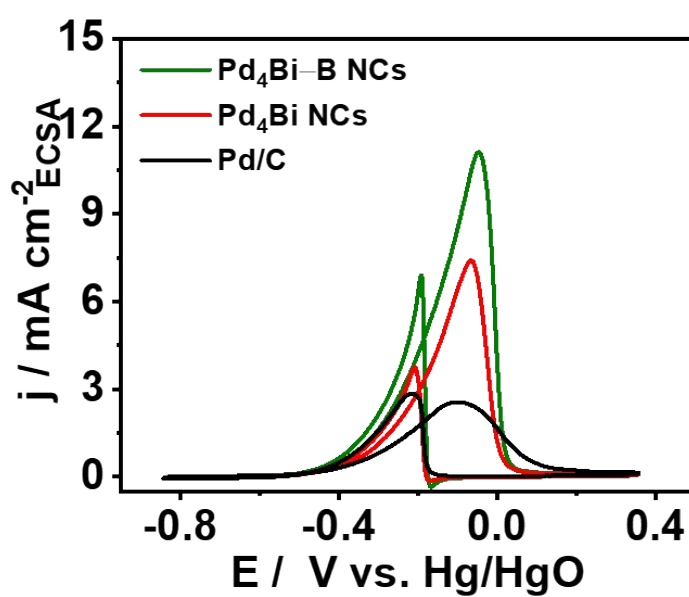

**Fig. S5** Specific activity of different catalysts.

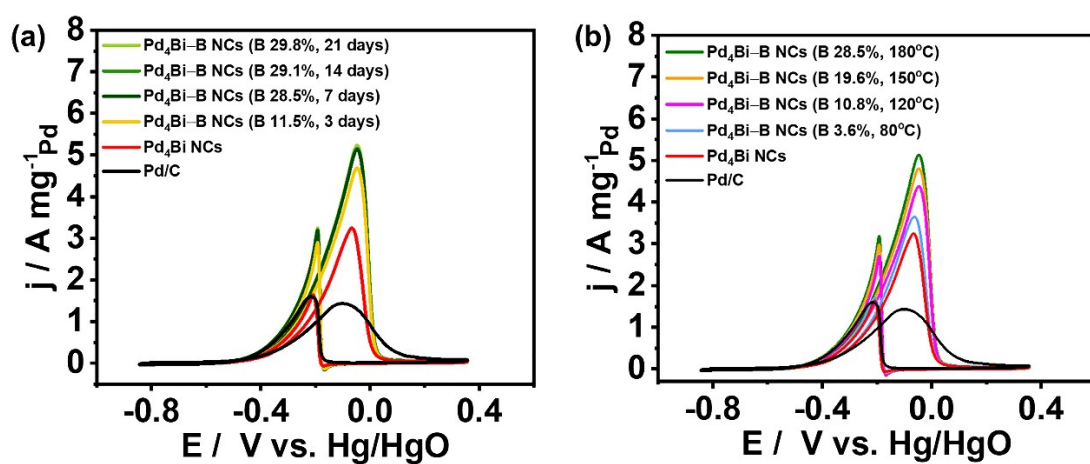

**Fig. S6.** CVs with Pd<sub>4</sub>Bi-B NCs obtained from different (a) reaction times and (b) reaction temperatures.

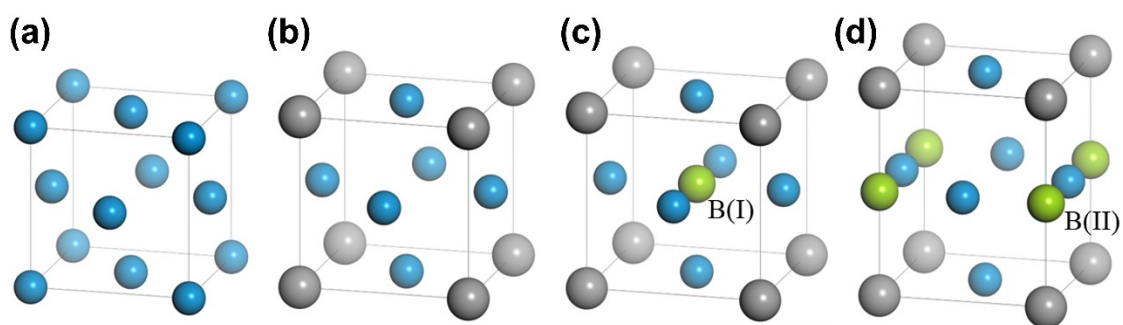

**Fig. S7** Unit cell models for DFT calculations. (a) Pd, (b) Pd-Bi, (c) and (d) Pd-Bi-B models (Pd: blue, Bi: gray, B: green).



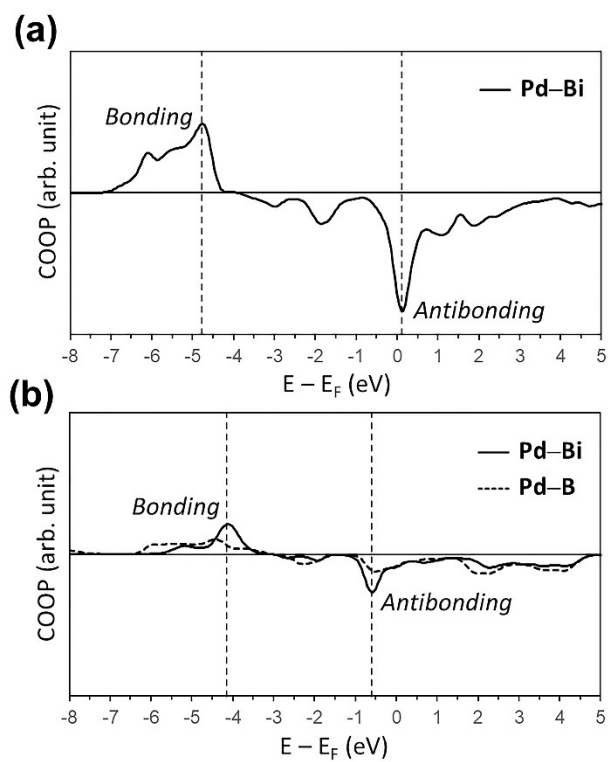

**Fig. S8** The crystal orbital overlap population (COOP) for (a) Pd-Bi and (b) Pd-Bi-B models. The locations of bonding and anti-bonding states between Pd and Bi are indicated with dashed lines.

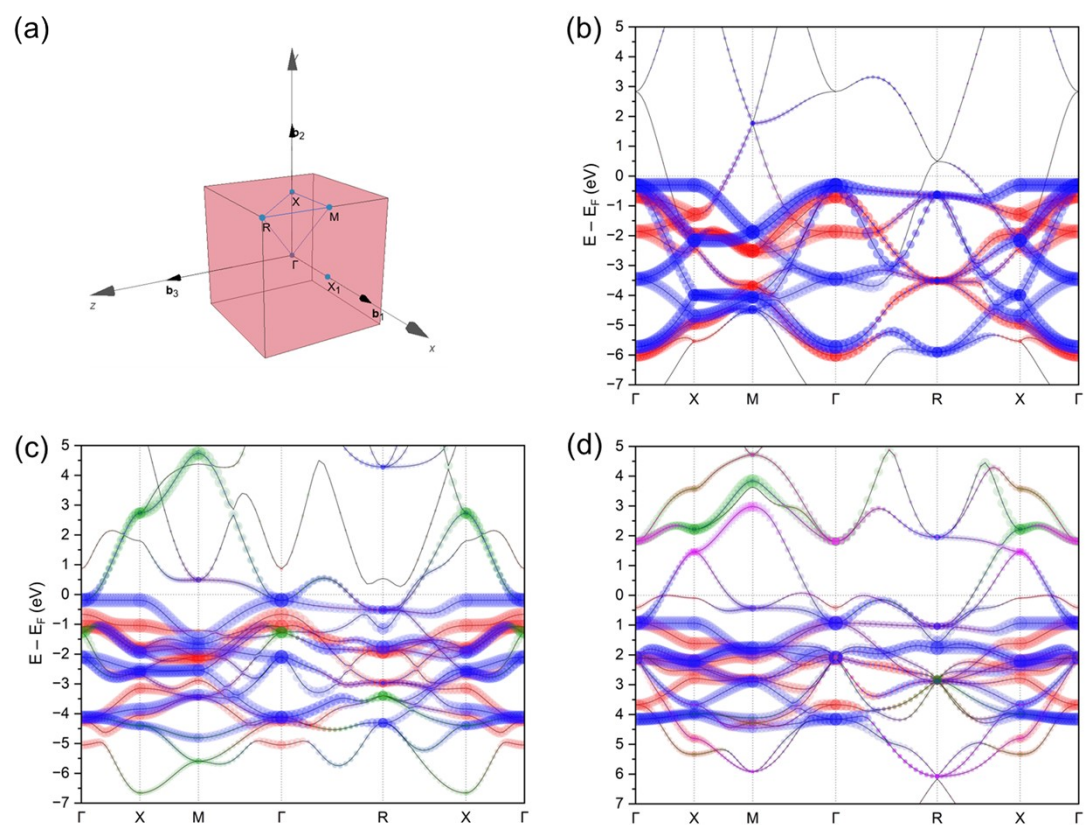

**Fig. S9** (a) Electronic band path in Brillouin zone of Pd–Bi–B model, automatically generated in <http://www.materialscloud.org/tools/seekpath>. Electronic band diagrams for (b) Pd, (c) Pd–Bi, and (d) Pd–Bi–B models. The relative distributions of Pd 5d  $t_{2g}$ , Pd 5d  $e_g$ , Bi 2p, and B 2p states are represented with blue, red, green, and pink dots.

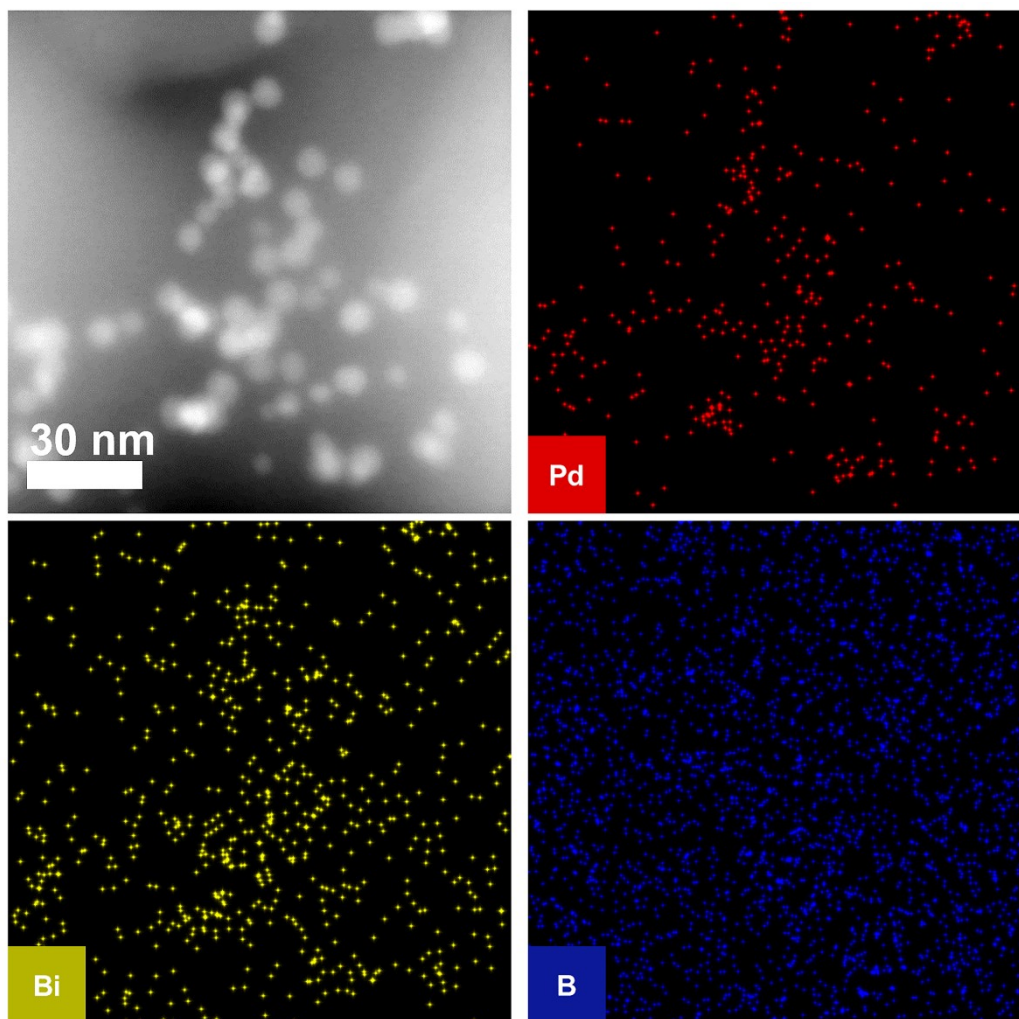

**Fig. S10** HAADF-STEM and corresponding EDS elemental mapping images of Pd<sub>4</sub>Bi-B NCs after the durability test (after 30000 cycles).

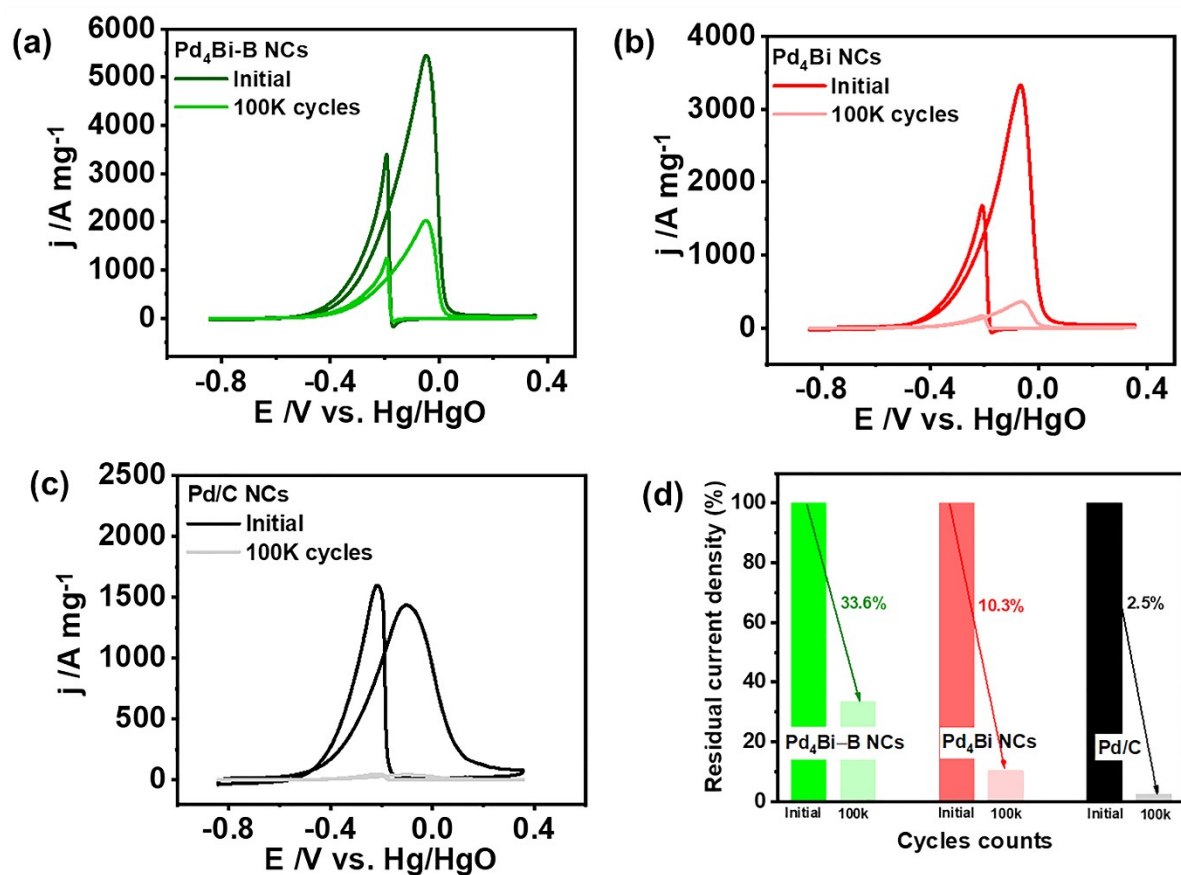

**Fig. S11** (a-c) Accelerating durability test (ADT) for different catalysts under the scan rate of  $50 \text{ mVs}^{-1}$  in  $1.0 \text{ M KOH} + 1.0 \text{ M ethanol}$  for 100,000 cycles. (d) Residual current density to the respective catalysts.

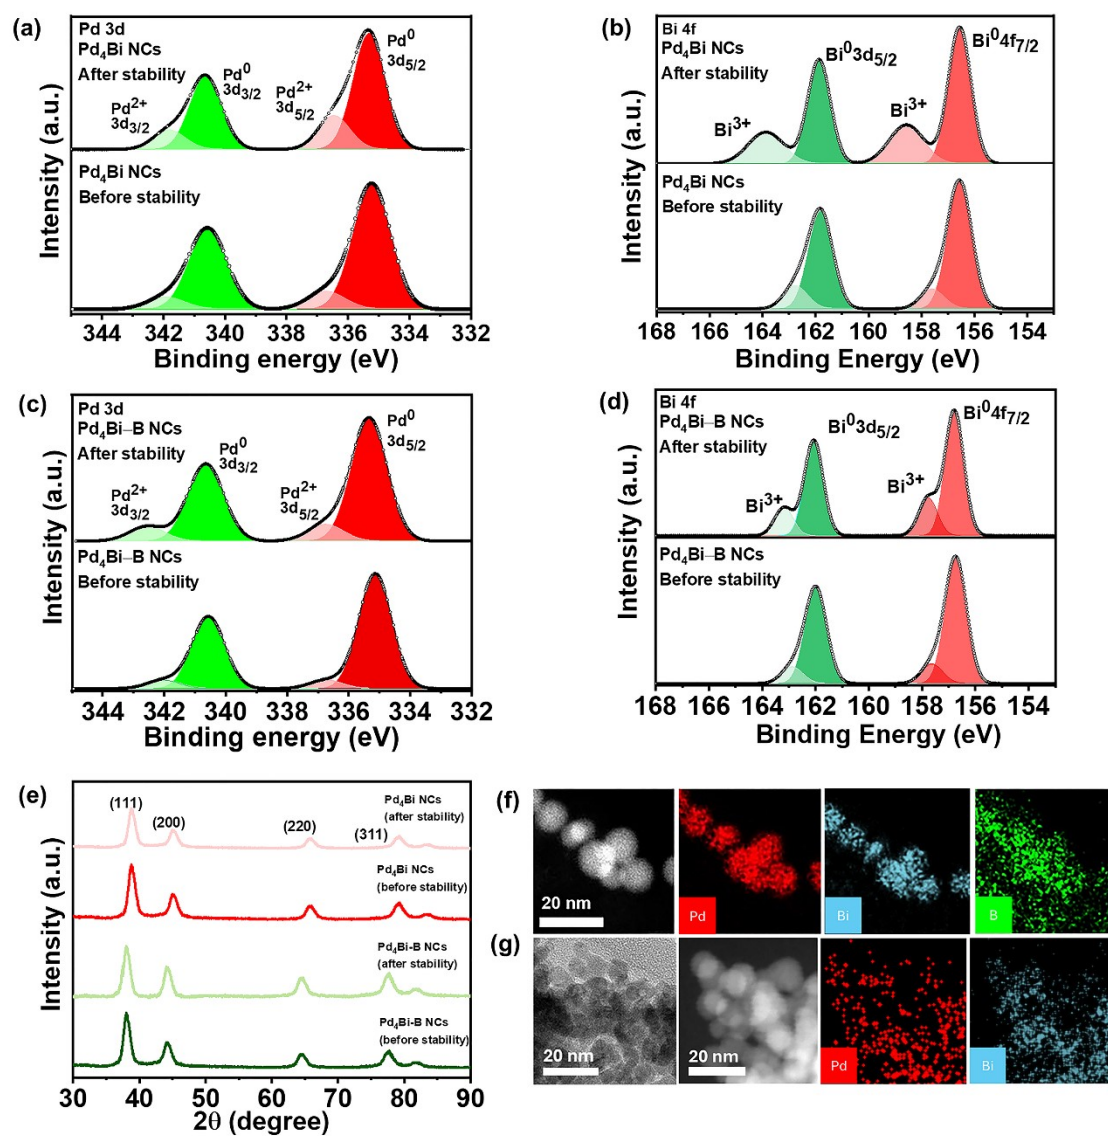

**Fig. S12** (a-d) XPS spectra of Pd<sub>4</sub>Bi and Pd<sub>4</sub>Bi-B NCs before and after stability test. (a) Pd 3d and (b) Bi 4f core level XPS spectra of Pd<sub>4</sub>Bi NCs. (c) Pd 3d and (d) Bi 4f core level XPS spectra of Pd<sub>4</sub>Bi-B NCs. (e) XRD patterns of Pd<sub>4</sub>Bi and Pd<sub>4</sub>Bi-B NCs before and after stability test. TEM, HAADF-STEM, and corresponding EDS elemental mapping images of (f) Pd<sub>4</sub>Bi-B and (g) Pd<sub>4</sub>Bi NCs after the stability test.

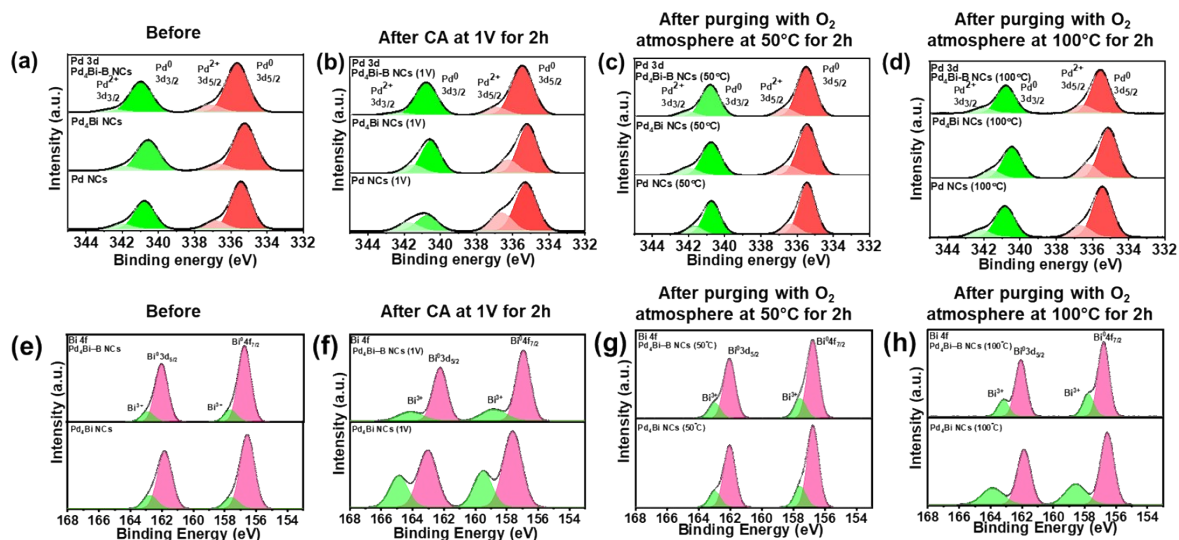

**Fig. S13** (a-d) Pd 3d XPS spectra of Pd<sub>4</sub>Bi-B, Pd<sub>4</sub>Bi, and Pd NCs (a) before treatment, (b) after CA at 1 V<sub>RHE</sub> for 2 h, (c) in an O<sub>2</sub> atmosphere at 50°C, and (d) in an O<sub>2</sub> atmosphere at 100°C. (e-h) Bi 4f XPS spectra of Pd<sub>4</sub>Bi-B, Pd<sub>4</sub>Bi, and Pd NCs (e) before treatment, (f) after CA at 1 V<sub>RHE</sub> for 2 h, (g) in an O<sub>2</sub> atmosphere at 50°C, and (h) in an O<sub>2</sub> atmosphere at 100°C.

**Table S1.** The Pd/Bi/B atomic ratios with different reaction times and temperatures.

| Catalyst                           | Pd<br>(atomic%) | Bi<br>(atomic%) | B<br>(atomic%) |
|------------------------------------|-----------------|-----------------|----------------|
| Pd <sub>4</sub> Bi-B NCs (21 days) | 56.21           | 13.98           | 29.81          |
| Pd <sub>4</sub> Bi-B NCs (14 days) | 56.78           | 14.10           | 29.12          |
| Pd <sub>4</sub> Bi-B NCs (7 days)  | 57.25           | 14.25           | 28.50          |
| Pd <sub>4</sub> Bi-B NCs (3 days)  | 71.15           | 17.35           | 11.50          |
| Pd <sub>4</sub> Bi-B NCs (180°C)   | 57.25           | 14.25           | 28.50          |
| Pd <sub>4</sub> Bi-B NCs (150°C)   | 65.29           | 15.09           | 19.62          |

|                                       |              |              |              |
|---------------------------------------|--------------|--------------|--------------|
| <b>Pd<sub>4</sub>Bi–B NCs (120°C)</b> | <b>71.45</b> | <b>17.80</b> | <b>10.76</b> |
| <b>Pd<sub>4</sub>Bi–B NCs (80°C)</b>  | <b>75.87</b> | <b>20.55</b> | <b>3.58</b>  |
| <b>Pd<sub>4</sub>Bi NCs</b>           | <b>80.10</b> | <b>19.90</b> | <b>-</b>     |

---

**Table S2.** The mass activities and specific activities of different catalysts in 1.0 M KOH + 1.0 M ethanol.

| Catalyst                      | Mass Activity            | Specific Activity         |
|-------------------------------|--------------------------|---------------------------|
| <b>Pd<sub>4</sub>Bi-B NCs</b> | 5240 mA mg <sup>-1</sup> | 11.13 mA cm <sup>-2</sup> |
| <b>Pd<sub>4</sub>Bi NCs</b>   | 3300 mA mg <sup>-1</sup> | 7.51 mA cm <sup>-2</sup>  |
| <b>Pd/C</b>                   | 1320 mA mg <sup>-1</sup> | 2.61 mA cm <sup>-2</sup>  |

**Table S3.** Lattice constant, interlayer distance between (111) planes [ $d_{(111)}$ ], and d-band center for the conventional unit cells of Pd, Pd-Bi, Pd-Bi-B models, which were estimated using PBE-D3 (PBE) calculations. The energetically stable Pd-Bi-B model I was used to obtain numerical data.

|                                   | Pd            | Pd-Bi         | Pd-Bi-B       |
|-----------------------------------|---------------|---------------|---------------|
| <b>Lattice constant (Å)</b>       | 3.88 (3.94)   | 4.08 (4.14)   | 4.29 (4.33)   |
| <b><math>d_{(111)}</math> (Å)</b> | 2.24 (2.28)   | 2.36 (2.39)   | 2.48 (2.50)   |
| <b>d-band center (eV)</b>         | -1.97 (-1.83) | -1.79 (-1.69) | -2.11 (-2.03) |



**Table S4.** Net atomic charge (in  $e$ ) obtained using density-derived electrostatic and chemical (DDEC) method. The asterisk star (\*) indicates the charge transfer from the directly neighboring Pd and Bi atoms to B in Pd–Bi–B models.

|           | <b>Pd–Bi</b> | <b>Pd–Bi–B (model I)</b> | <b>Pd–Bi–B (model II)</b> |
|-----------|--------------|--------------------------|---------------------------|
| <b>Pd</b> | –0.024       | 0.141*                   | 0.069*                    |
|           |              |                          | –0.053                    |
| <b>Bi</b> | 0.072        | 0.061                    | 0.285*                    |
| <b>B</b>  |              | –0.486                   | –0.370                    |

**Table S5.** Comparison of EOR activities of Pd<sub>4</sub>Bi–B and Pd<sub>4</sub>Bi NCs with previously reported catalysts.

| Catalyst                                  | Mass activity                  | References       |
|-------------------------------------------|--------------------------------|------------------|
| <b>Pd<sub>4</sub>Bi–B NCs</b>             | <b>5240 mA mg<sup>-1</sup></b> | <b>This work</b> |
| <b>Pd<sub>4</sub>Bi NCs</b>               | <b>3300 mA mg<sup>-1</sup></b> | <b>This work</b> |
| Pd <sub>14</sub> Ag <sub>1</sub> NP       | 243 mA mg <sup>-1</sup>        | 76               |
| WF-PdCu NSs                               | 475 mA mg <sup>-1</sup>        | 77               |
| PdAgCu NWs                                | 4640 mA mg <sup>-1</sup>       | 78               |
| PdPtCu NSs                                | 2607 A mg <sup>-1</sup>        | 79               |
| PdBi-Bi(OH) <sub>3</sub>                  | 4460 mA mg <sup>-1</sup>       | 80               |
| PdCu@N-G                                  | 4300 mA mg <sup>-1</sup>       | 81               |
| PdBP MSs                                  | 3650 m A mg <sup>-1</sup>      | 82               |
| Pd <sub>0.9</sub> Sb <sub>0.1</sub> /PC   | 4244 mA mg <sup>-1</sup>       | 83               |
| CoP/RGO-Pd                                | 4597 mA mg <sup>-1</sup>       | 84               |
| Pd <sub>2</sub> Sn:P/C                    | 5003 mA mg <sup>-1</sup>       | 85               |
| Pd <sub>76</sub> Ag <sub>24</sub><br>WNWs | 3480 mA mg <sup>-1</sup>       | 86               |
| TS-Pd/C                                   | 1846 mA mg <sup>-1</sup>       | 87               |
| PdAg/30CeO <sub>2</sub> /C                | 4941 mA mg <sup>-1</sup>       | 88               |

**Table S6.** Comparison of EOR durability of Pd<sub>4</sub>Bi–B and Pd<sub>4</sub>Bi NCs with previously reported catalysts.

| Catalyst                                             | Mass activity                  | ADT result                      | References       |
|------------------------------------------------------|--------------------------------|---------------------------------|------------------|
|                                                      |                                | (residual current density / % ) |                  |
| <b>Pd<sub>4</sub>Bi–B NCs</b>                        | <b>5240 mA mg<sup>-1</sup></b> | <b>30k cycles – 79.9%</b>       | <b>This work</b> |
| PdS <sub>x</sub> /C                                  | 170 mA mg <sup>-1</sup>        | 3.6k cycles – 64.4 %            | 60               |
| Pd <sub>50</sub> W <sub>27</sub> Nb <sub>23</sub> /C | 1560 mA mg <sup>-1</sup>       | 3k cycles – 69.9 %              | 61               |
| PdNi-HNPs-R/C                                        | 1200 mA mg <sup>-1</sup>       | 1.5k cycles – 79.1 %            | 62               |
| mPdNi/Ni NTs                                         | 1520 mA mg <sup>-1</sup>       | 1k cycles – 82.1%               | 63               |
| Pd <sub>1</sub> Nb <sub>1</sub> /C                   | 850 mA mg <sup>-1</sup>        | 1k cycles – 55.3 %              | 64               |
| PdSn NCs                                             | 2700 mA mg <sup>-1</sup>       | 0.5k cycles – 64.1 %            | 65               |
| PdRhTe NTs                                           | 3400 mA mg <sup>-1</sup>       | 0.5k cycles – 80.4 %            | 66               |
| Pd-Au HNS                                            | 9100 mA mg <sup>-1</sup>       | 2k cycles – 89.1 %              | 67               |
| Pd-CeO <sub>2-NR</sub> /C                            | 1130 mA mg <sup>-1</sup>       | 2k cycles – 61.2 %              | 68               |
| Pd NPs@Ni SAC                                        | 1093 mA mg <sup>-1</sup>       | 4.0k cycles - 90 %              | 69               |
| PdB NWs                                              | 3390 mA mg <sup>-1</sup>       | 10k cycles-74%                  | 70               |
| Pdene/Ti <sub>3</sub> C <sub>2</sub> T <sub>x</sub>  | 7470 mA mg <sup>-1</sup>       | 500 cycles – 94%                | 71               |
| Pd-Pt alloy                                          | 3369 mA mg <sup>-1</sup>       | 0.3 cycles – 71.2%              | 72               |
| Pd-Sn/TiO <sub>2</sub>                               | 3381 mA mg <sup>-1</sup>       | 0.3 cycles – 80%                | 73               |

|                                       |                          |                     |    |
|---------------------------------------|--------------------------|---------------------|----|
| PdMn-N <sub>4</sub> /CNTs             | 3740 mA mg <sup>-1</sup> | 1000 cycles – 95%   | 74 |
| Pd <sub>70</sub> /Ni(OH) <sub>2</sub> | 1520 mA mg <sup>-1</sup> | 1000 cycles – 89.3% | 75 |

---

## References

- S1 J. P. Perdew, K. Burke, M. Ernzerhof, *Phys. Rev. Lett.* 1996, **77**, 3865-3868.
- S2 G. Kresse, J. Hafner, *Phys. Rev. B* 1993, **47**, 558-561.
- S3 G. Kresse, J. Furthmüller, *Phys. Rev. B* 1996, **54**, 11169-11186.
- S4 S. Grimme, J. Antony, S. Ehrlich, H. Krieg, *J. Chem. Phys.* 2010, **132**, 154104.
- S5 G. Kresse, D. Joubert, *Phys. Rev. B* 1999, **59**, 1758-1775.
- S6 J. W. Arblaster, *Platin. Met. Rev.* 2012, **56**, 181-189.
- S7 R. Nelson, C. Ertual, J. George, V. Deringer, G. Hautier, R. Dronskowski, *J. Comput. Chem.* 2020, **41**, 1931-1940.
- S8 T.A. Manz, D.S. Sholl, *J. Chem. Theory Comput.* 2012, **8**, 2844-2867
